# Supplementary material for: Comprehensive analysis of peroxisome proliferator-activated receptors to predict the drug resistance, immune microenvironment, and prognosis in stomach adenocarcinomas
Source: PeerJ journal article supplement (doi:10.7717/peerj.17082), 2024-03-22

**A**

PPARA High Low

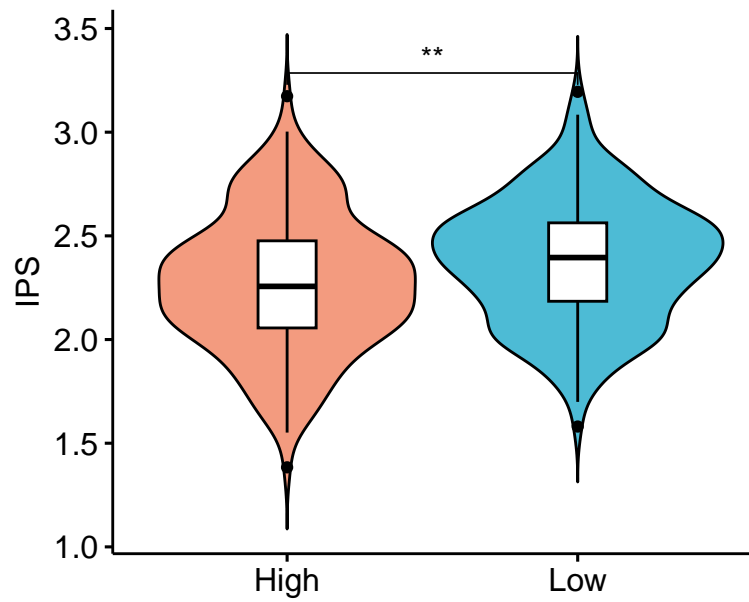

PPARD High Low

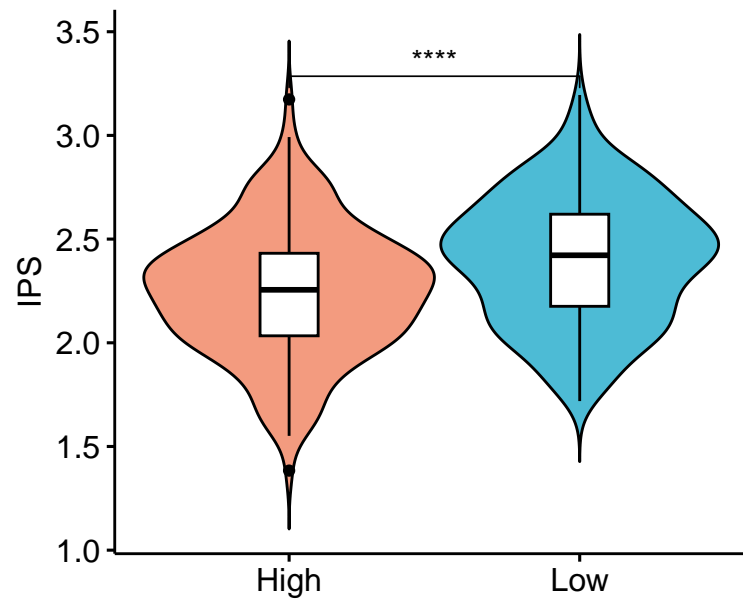

PPARG High Low

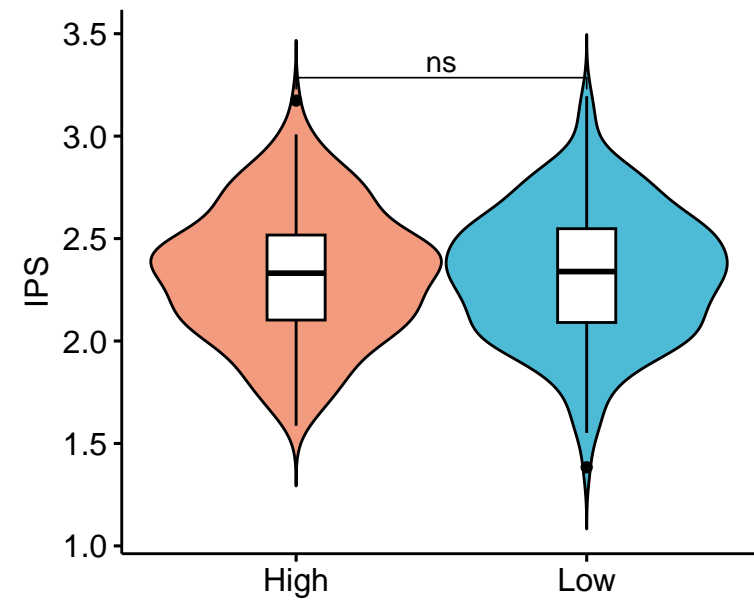**B**

PPARA High Low

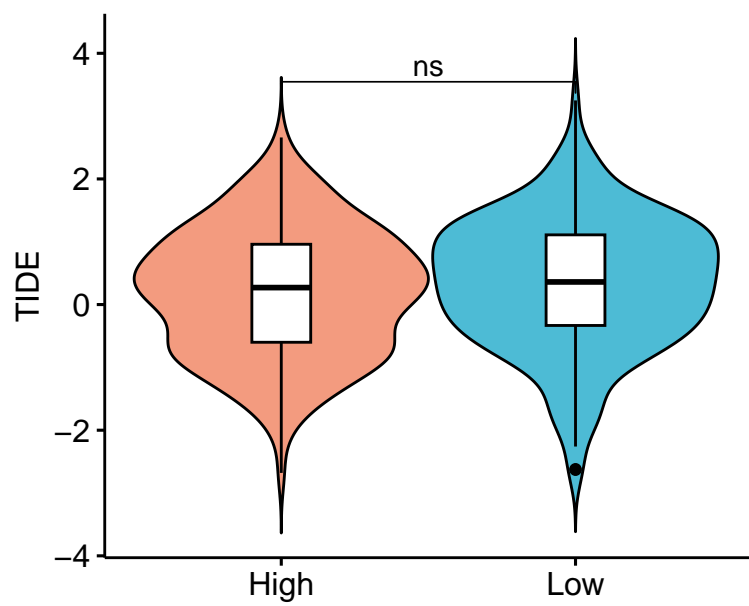

PPARD High Low

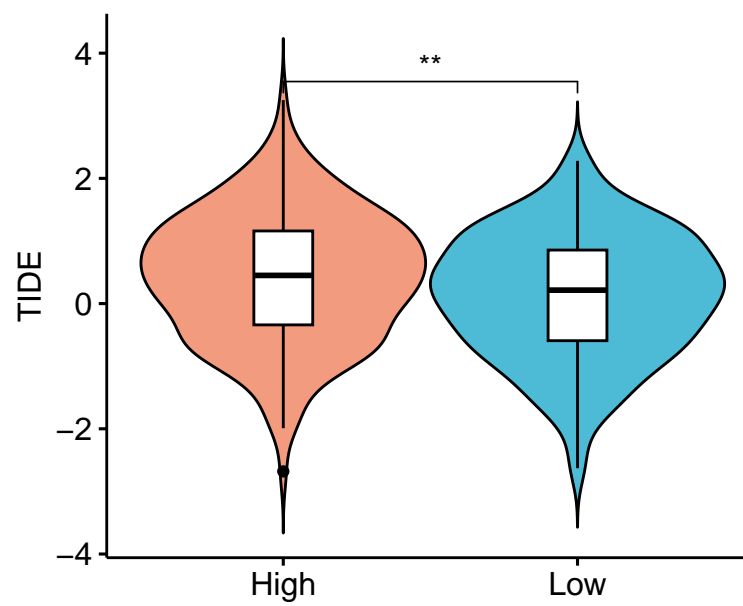

PPARG High Low

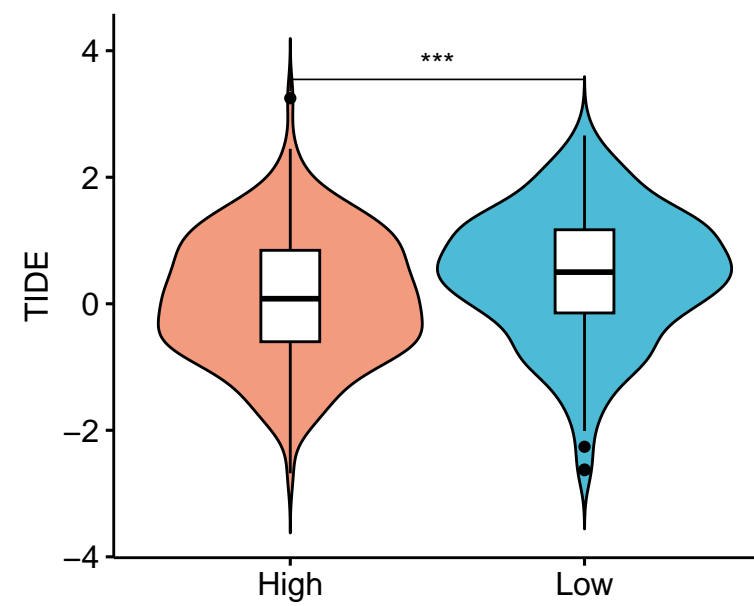

Supplement: FigureS1.pdf [file FigureS1.pdf]
