# Supplementary figures and images for: Comprehensive analysis of peroxisome proliferator-activated receptors to predict the drug resistance, immune microenvironment, and prognosis in stomach adenocarcinomas
Source: PeerJ journal article supplement (doi:10.7717/peerj.17082), 2024-03-22

# Repeat 1

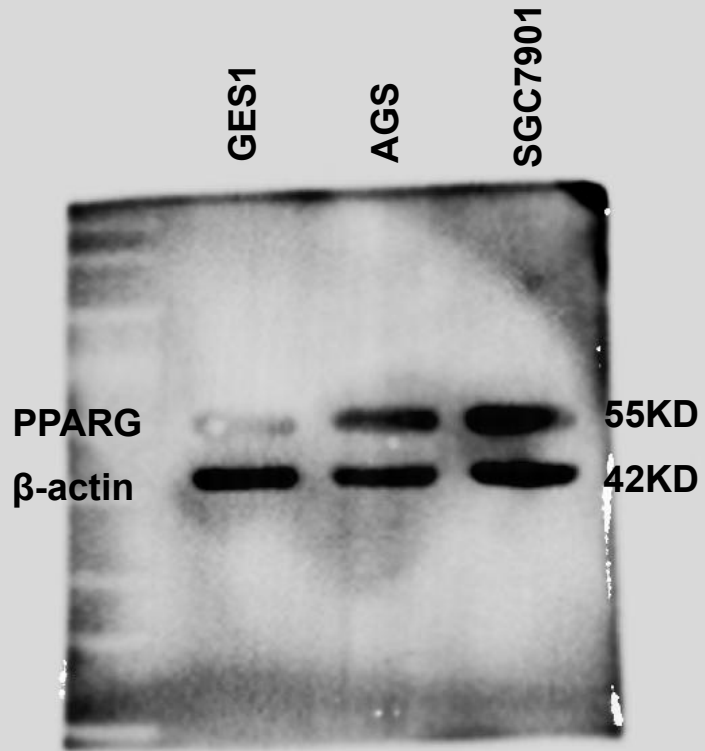

## Repeat 2

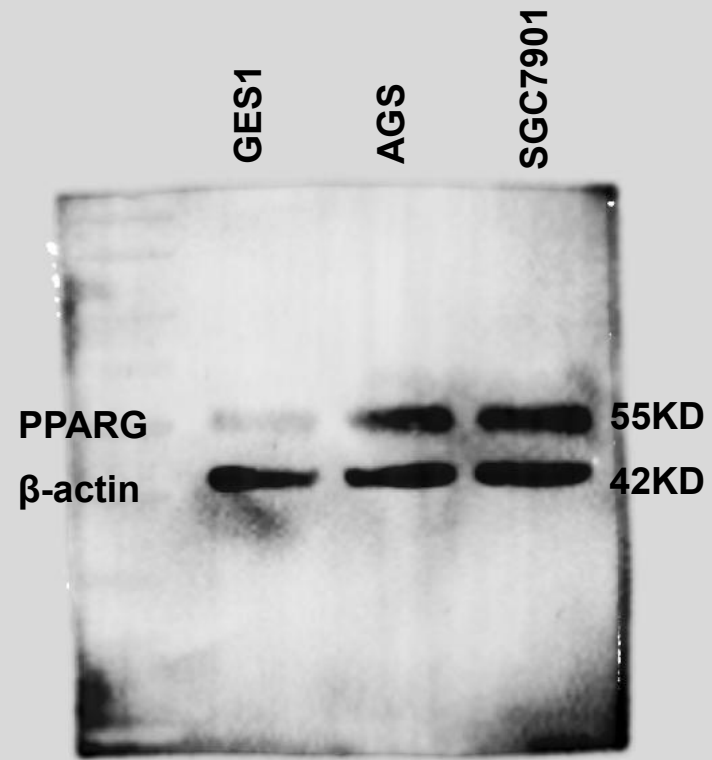

# Repeat 3

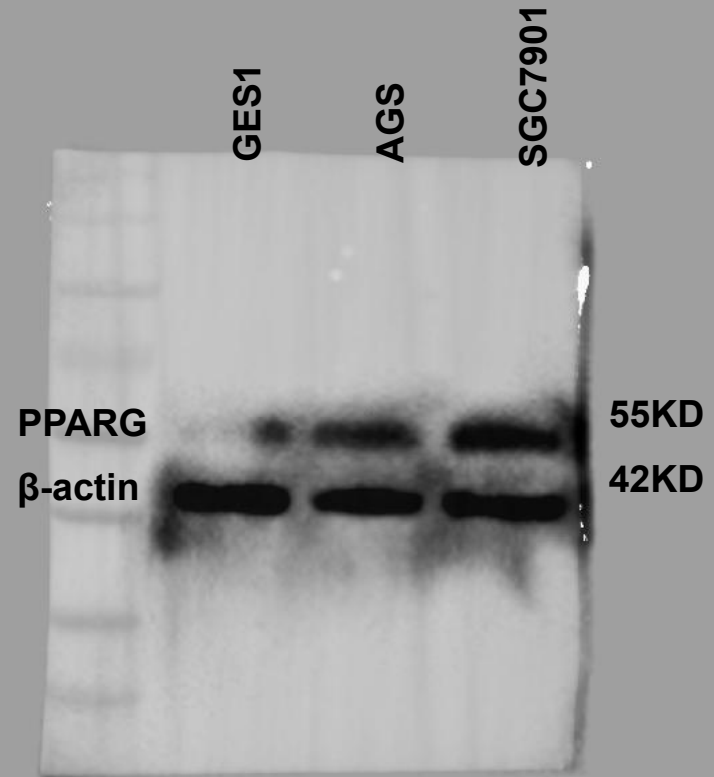

Supplement: raw_data.zip [file raw_data.zip]
